# Supplementary material for: Dual-reaction-centre enabled concurrent N–C–N coupling for effective urea electrosynthesis
Source: Royal Society of Chemistry journal article supplement (doi:10.1039/d5ta02152a), 2025-01-01
Supplement: d5ta02152a1.pdf [file d5ta02152a1.pdf]

Supporting Information

**Dual-Reaction-Centre Enabled Concurrent N–C–N coupling for Effective Urea Electrosynthesis**

Junxian Liu,<sup>a</sup> Sean C. Smith,<sup>b</sup> Xin Tan, <sup>\*c</sup> YuanTong Gu,<sup>a</sup> and Liangzhi Kou<sup>\*a</sup>

<sup>a</sup> School of Mechanical, Medical and Process Engineering, Queensland University of Technology, Brisbane, QLD 4001, Australia. E-mail: liangzhi.kou@qut.edu.au

<sup>b</sup> Integrated Materials Design Laboratory, Department of Materials Physics, Research School of Physics, The Australian National University, Australian Capital Territory, Canberra, ACT 2601, Australia.

<sup>c</sup> Institute for Carbon Neutralization Technology, College of Chemistry and Materials Engineering, Wenzhou University, Wenzhou, Zhejiang 325035, P. R. China. E-mail: xintan@wzu.edu.cn

## Computational Details

**DFT computations.** We perform spin-polarized DFT calculations within the Vienna Ab initio Simulation Package (VASP).<sup>1</sup> The ion-electron interactions are described with the projector-augmented wave pseudopotential (PAW).<sup>2,3</sup> The electron exchange-correlation energy is calculated by Perdew-Burke-Ernzerhof (PBE) functional at the generalized gradient approximation (GGA) level.<sup>4</sup> A 520 eV cutoff energy for the plane-wave basis is adopted in all the computations. The convergence criteria for the electronic self-consistent loop and the Hellmann-Feynman forces are set to be less than  $10^{-5}$  eV and 0.01 eV/Å, respectively. The Brillouin zones are sampled using the Monkhorst-Pack mesh with a reciprocal space resolution of  $2\pi \times 0.03 \text{ Å}^{-1}$  for structural optimization and  $2\pi \times 0.01 \text{ Å}^{-1}$  for electronic properties calculations. A Gaussian smearing is employed with a smearing width of 0.05 eV. To prevent the artifactual interaction between periodical cells, a vacuum layer of 20 Å is applied along the z-direction. Grimme's D3 correction is adopted to describe the long-range van der Waals (vdW) interactions here.<sup>5-9</sup> The computational results are subsequently post-processed using the VASPKIT code.<sup>10</sup> To calculate the transition states and kinetic barriers of the key reaction step, the climbing image nudged elastic band (CI-NEB) approach is used with the force convergence of 0.03 eV/Å.<sup>11, 12</sup> The AIMD simulations are performed using the NVT ensemble at 300 K for 20 ps.<sup>13</sup> The aqueous environment is modeled as a continuum dielectric by the Poisson-Boltzmann implicit solvation using VASPsol code with a relative permittivity of 80.<sup>14, 15</sup>

The cohesive energy of  $\text{PcTM}_1\text{-O}_8\text{-TM}_2$  is defined as

$$E_{\text{coh}} = E_{\text{tot}} - 32E_{\text{C}} - 8E_{\text{O}} - 8E_{\text{N}} - 8E_{\text{H}} - E_{\text{TM}_1} - 2E_{\text{TM}_2} \quad (\text{S1})$$

where  $E_{\text{tot}}$  is the total energy of  $\text{PcTM}_1\text{-O}_8\text{-TM}_2$ ,  $E_{\text{TM}_1}$  and  $E_{\text{TM}_2}$  are the energies of the metal atoms in their bulk phase.  $E_{\text{C}}$ ,  $E_{\text{O}}$ ,  $E_{\text{N}}$ , and  $E_{\text{H}}$  represent the energies of C, O, N, H atoms in their stable solid or gas phases.

**Free energy computations.** The free energy change for each electrochemical elementary reaction step ( $\Delta G$ ) is calculated following the computational hydrogen electrode (CHE) model developed by Nørskov et al.,<sup>16, 17</sup> according to which the  $\Delta G$  is evaluated as:

$$\Delta G = \Delta E + \Delta E_{\text{ZPE}} - T\Delta S + \Delta G_{\text{U}} + \Delta G_{\text{pH}} \quad (\text{S2})$$

where  $\Delta E$  is the DFT computed reaction energy,  $\Delta E_{\text{ZPE}}$  and  $\Delta S$  are the differences between the adsorbed species and the gas phase in zero-point energy and entropy, respectively.  $T$  is the temperature of 298.15 K in our work. For adsorbed reaction intermediates, their  $E_{\text{ZPE}}$  and  $TS$  are obtained through

vibrational frequencies computations, while for molecules these values are taken from the NIST database. The specific values for  $E_{\text{ZPE}}$  and TS involved in this work are provided in Tables S5-9.  $\Delta G_{\text{U}}$  and  $\Delta G_{\text{pH}}$  are the effects of the applied electrode potential  $U$  and  $\text{H}^+$  concentration, which can be determined as  $-eU$  and  $-k_{\text{B}}T \ln 10 \times \text{pH}$ , respectively, where  $k_{\text{B}}$  is Boltzmann constant and the value of pH is assumed to be zero in a highly acidic solution.

**Constant potential method.** To more realistically simulate the influence of the experimental reaction condition on the intrinsic selectivity activity of  $\text{PcV-O}_8\text{-Mn}$ , the constant-potential method is adopted.<sup>18, 19</sup> The aqueous environment is modeled using the implicit solvation approach with a relative permittivity of 80 by VASPsol code, in combination with explicit water molecules to better reflect solvation effects. Specifically, three randomly distributed  $\text{H}_2\text{O}$  molecules are incorporated as explicit water clusters, as previous studies have demonstrated that this solvation model provides a favorable balance between computational cost and accuracy, yielding more reliable results compared to models with more explicit water molecules.<sup>20-22</sup> The charges for each system are added from  $-1.0\text{ e}$  to  $+1.0\text{ e}$  in steps of  $0.5\text{ e}$  to clarify the electrode potential function. The potential dependent energy ( $E_{\text{q}}$ ) of the catalysts can be calculated as:

$$E_{\text{q}} = E_{\text{scf}} + E_{\text{corr}} - q\phi_{\text{q}} \quad (\text{S3})$$

where  $E_{\text{scf}}$  is the self-consistent energy of DFT calculations,  $E_{\text{corr}}$  is the correction energy of the homogeneous background charge,  $q$  is the added number of electrons, and  $-\phi_{\text{q}}$  is the work function of the charged slab.  $E_{\text{corr}}$  is the correction energy of background charge and is obtained by the average electrostatic potential of the systems  $\langle \overline{V}_{\text{tot}} \rangle$ :

$$E_{\text{corr}} = \int_0^q \langle \overline{V}_{\text{tot}} \rangle dQ \quad (\text{S4})$$

The electrode potential ( $U_{\text{q}}$ ) of the charged systems referenced to the standard hydrogen electrode (SHE) is calculated as

$$U_{\text{q}} = -4.6 - \phi_{\text{q}} / eV \quad (\text{S5})$$

where  $4.6\text{ V}$  is the work function of the  $\text{H}_2/\text{H}^+$  couple at standard conditions. The energy varies with the electrode potential as a quadratic function, which takes the form

$$E(U_{\text{q}}) = -\frac{1}{2}C(U_{\text{q}} - U_0)^2 + E_0 \quad (\text{S6})$$

where  $C$  is the capacitance of the system,  $U_0$  is the potential of zero charges (PZC), and  $E_0$  is the energy at the zero charges.

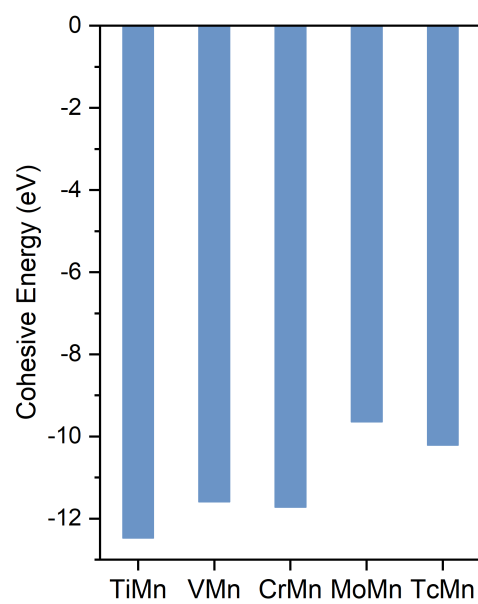

**Figure S1.** Cohesive energy of PcTM-O<sub>8</sub>-Mn (TM = Ti, V, Cr, Mo, and Tc).



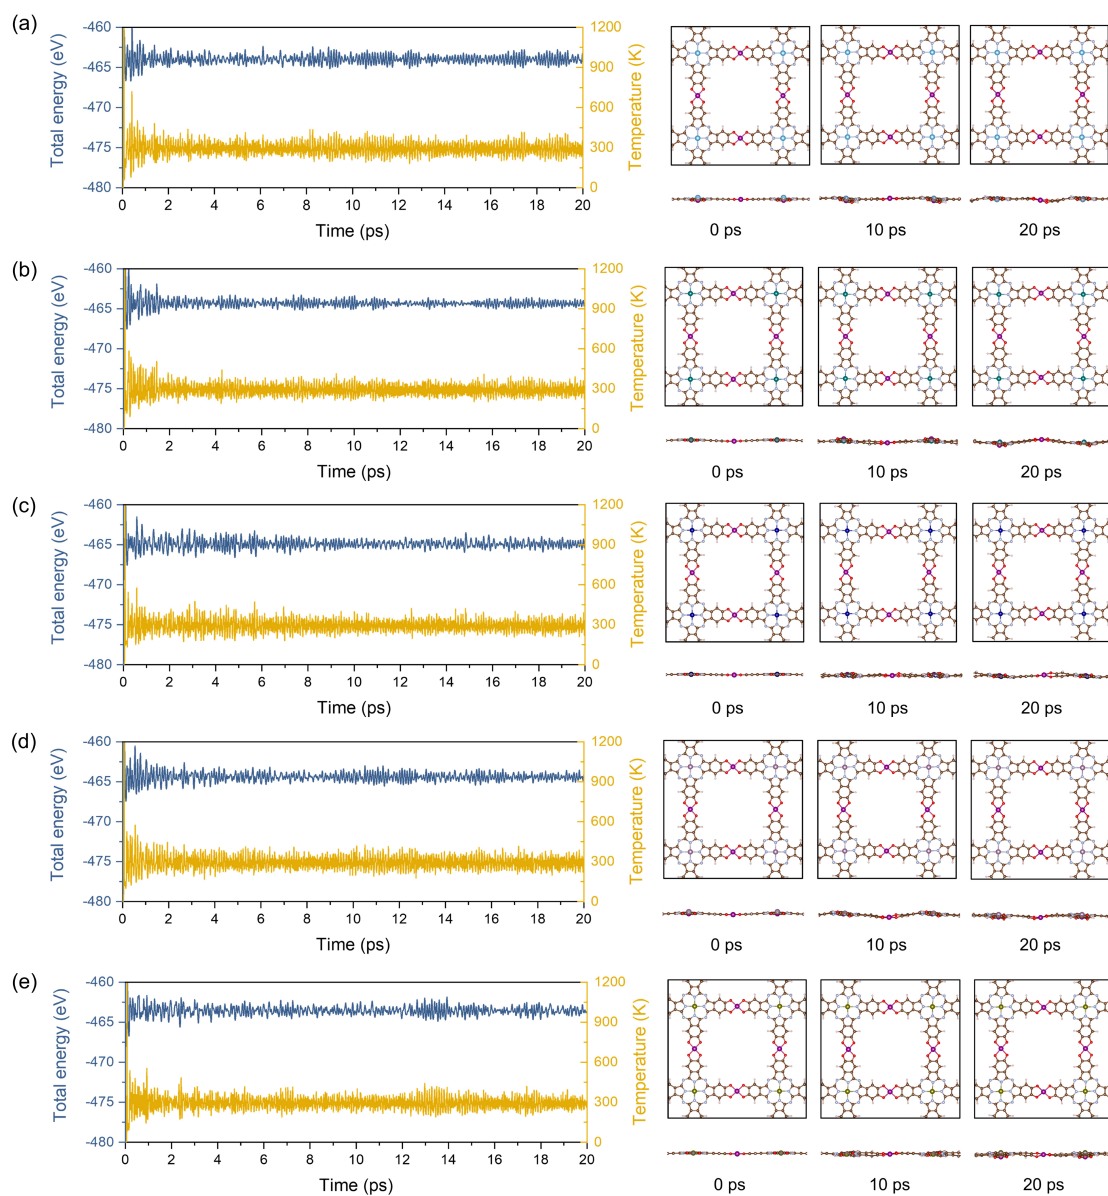

**Figure S2.** Variations of temperature and energy against time from AIMD simulations for PcTM-O<sub>8</sub>-Mn. (a) PcTi-O<sub>8</sub>-Mn, (b) PcV-O<sub>8</sub>-Mn, (c) PcCr-O<sub>8</sub>-Mn, (d) PcMo-O<sub>8</sub>-Mn, and (e) PcTc-O<sub>8</sub>-Mn. Right panels are structure snapshots of PcTM-O<sub>8</sub>-Mn at 300 K after 10 ps and 20 ps AIMD simulations, respectively.

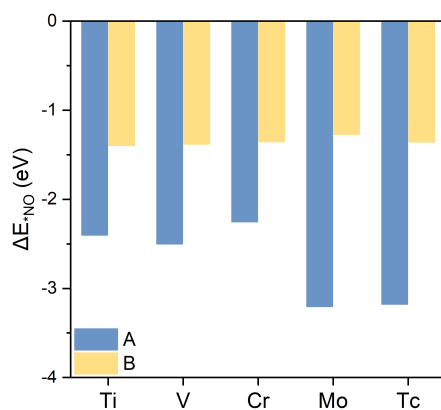

**Figure S3.** Adsorption energies of NO ( $\Delta E_{\text{NO}}^*$ ) on the A and B sites of PcTM-O<sub>8</sub>-Mn.

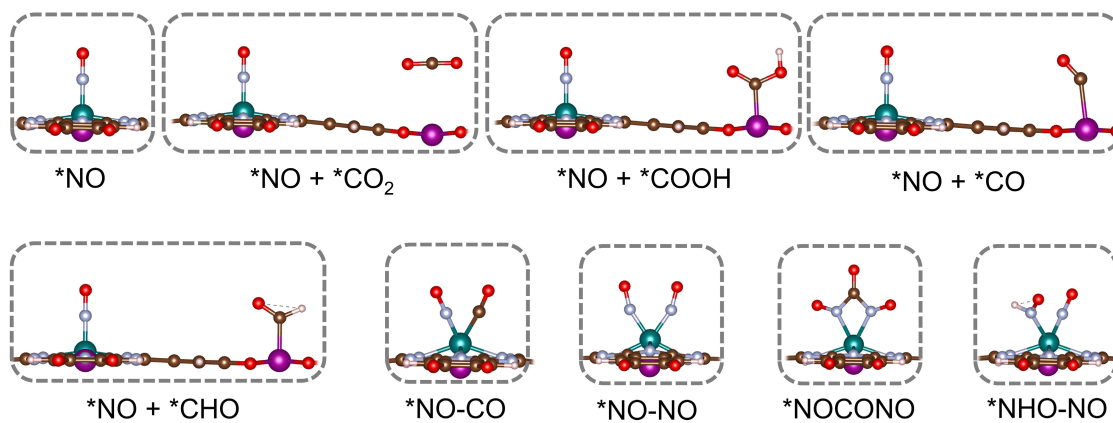

**Figure S4.** Side view of the atomic structures of optimized reaction intermediates involved in the synchronous NO activation and CO<sub>2</sub> reduction process on PcV-O<sub>8</sub>-Mn.



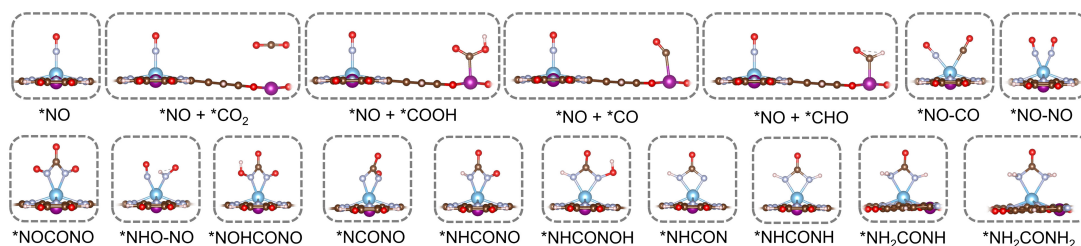

**Figure S6.** Side view of all optimized reaction intermediates throughout the urea formation process on PcTi-O<sub>8</sub>-Mn.

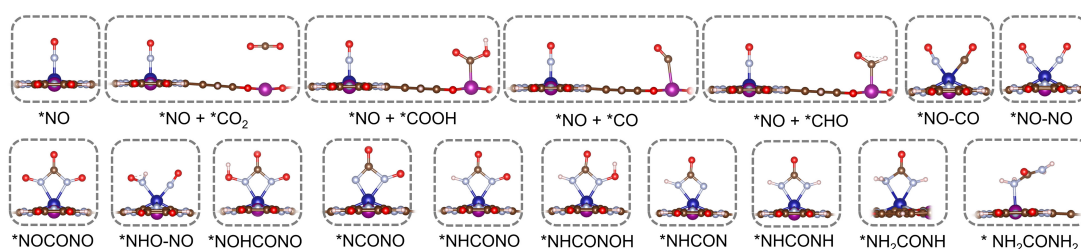

**Figure S7.** Side view of all optimized reaction intermediates throughout the urea formation process on PcCr-O<sub>8</sub>-Mn.

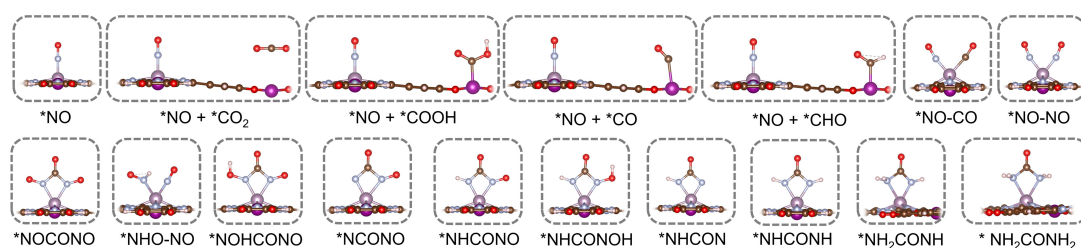

**Figure S8.** Side view of all optimized reaction intermediates throughout the urea formation process on PcMo-O<sub>8</sub>-Mn.

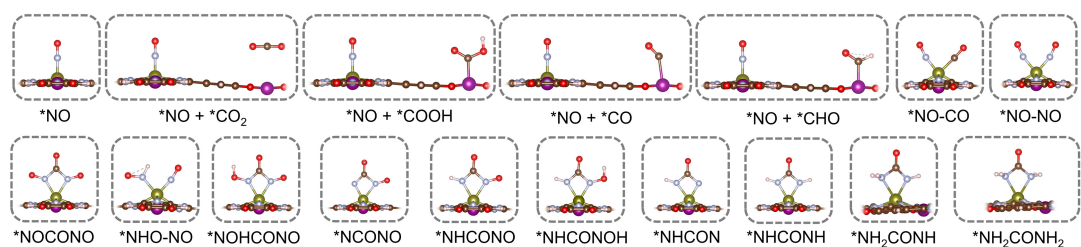

**Figure S9.** Side view of all optimized reaction intermediates throughout the urea formation process on PcTc-O<sub>8</sub>-Mn.

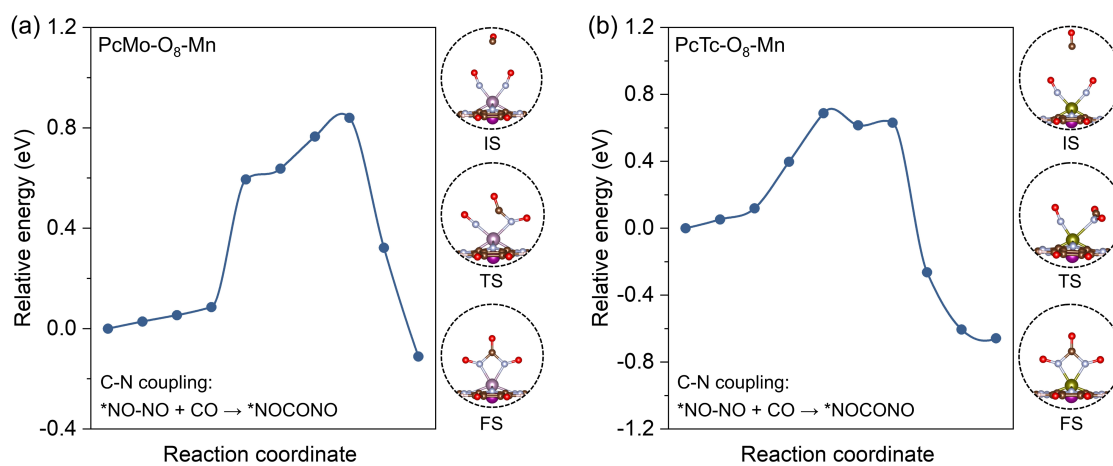

**Figure S10.** Kinetic energy barriers for N-C-N bond formation on (a) PcMo-O<sub>8</sub>-Mn and (b) PcTc-O<sub>8</sub>-Mn.

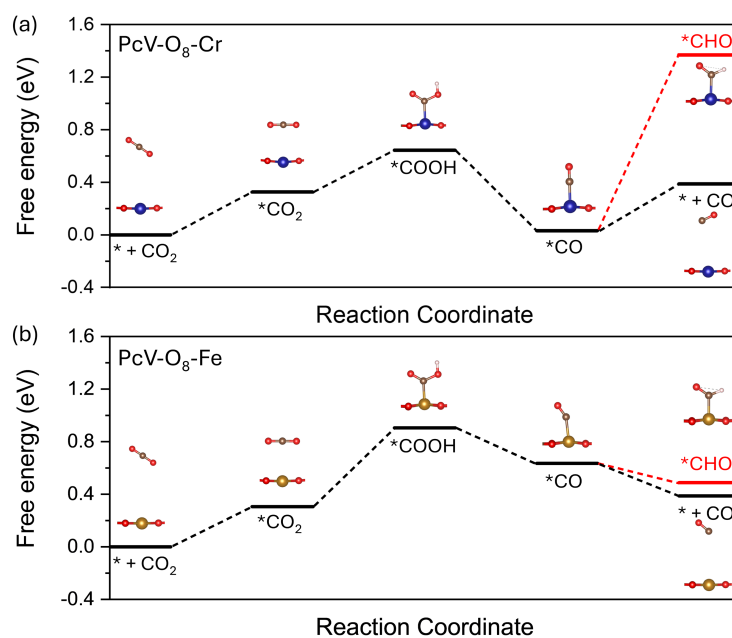

**Figure S11.** Free energy profiles of electrochemical CO<sub>2</sub> reduction on (a) Cr at PcV-O<sub>8</sub>-Cr and (b) Fe at PcV-O<sub>8</sub>-Fe.

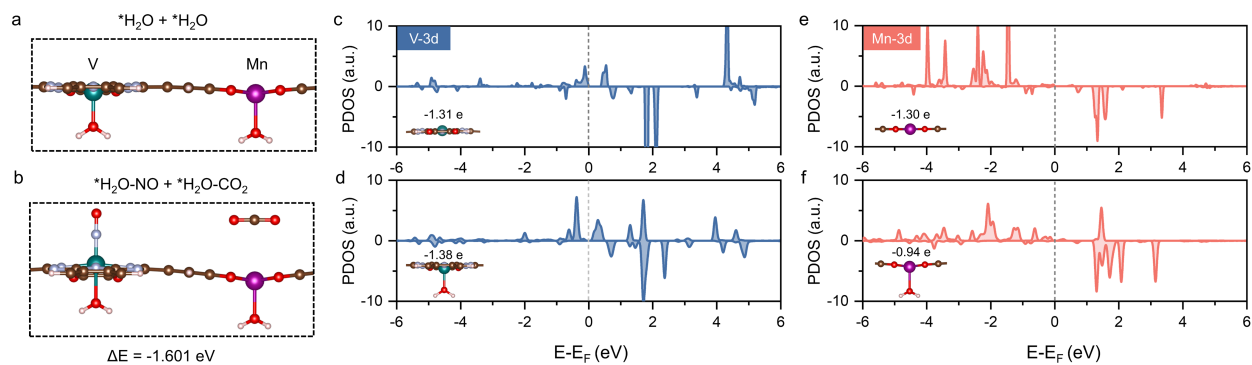

Figure S12. Side view of the optimized structures of (a)  $^*\text{H}_2\text{O} + ^*\text{H}_2\text{O}$  and (b)  $^*\text{H}_2\text{O-NO} + ^*\text{H}_2\text{O-CO}_2$  on  $\text{PcV-O}_8\text{-Mn}$  with two pre-adsorbed water molecules. PDOS of the V and Mn 3d orbitals for  $\text{PcV-O}_8\text{-Mn}$ : (c) and (e) without pre-adsorbed water molecules; (d) and (f) with two pre-adsorbed water molecules.

**Note 1: Construction of Pourbaix Diagrams.** The Pourbaix diagram reveals the thermodynamically stable structures in electrochemical systems as a function of pH and applied electrode potential ( $U_{\text{SHE}}$ ).<sup>23-27</sup> In this study, we constructed the Pourbaix diagrams for 2D PcTM-O<sub>8</sub>-Mn by calculating the free-energy changes for possible adsorption species, that is, \*O and \*OH. For both adsorbates, each reaction can be written as follows:

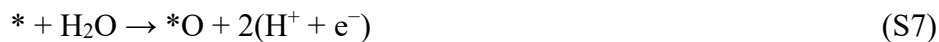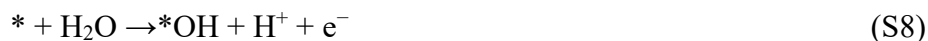

Then, free energy change ( $\Delta G$ ) for \*O and \*OH species were calculated at zero potential and standard conditions to obtain following equations:

$$\Delta G_{*O} = G_{*O} + G_{\text{H}_2} - G^* - G_{\text{H}_2\text{O}} \quad (\text{S9})$$

$$\Delta G_{*OH} = G_{*OH} + 0.5G_{\text{H}_2} - G^* - G_{\text{H}_2\text{O}} \quad (\text{S10})$$

Therefore, the  $\Delta G$  for \*O and \*OH species as a function of pH and U can be defined as follows at 298.15 K:

$$\Delta G(\text{pH}, U) = \Delta G - v(\text{H}^+) \cdot k_B T \cdot \ln 10 \cdot \text{pH} - v(\text{e}^-) \cdot e \cdot U \quad (\text{S11})$$

where  $k_B$  is the Boltzmann constant and the value of  $k_B T \cdot \ln 10$  is 0.059;  $v(\text{H}^+)$ , and  $v(\text{e}^-)$  are values for the stoichiometric coefficients of transferred protons and electrons of corresponding adsorption processes (Equations S1-2), respectively. And U denotes the applied electrode potential referenced to standard hydrogen electrode (SHE).

By applying pH and U, the  $\Delta G$  can be rewritten as follows:

$$\begin{aligned} \Delta G_{*O}(\text{pH}, U) &= \Delta G_{O^*} - 2(0.059 \cdot \text{pH}) - 2eU \\ &= \Delta G_{O^*} - 0.118 \cdot \text{pH} - 2eU \end{aligned} \quad (\text{S12})$$

$$\Delta G_{*OH}(\text{pH}, U) = \Delta G_{OH^*} - 0.059 \cdot \text{pH} - eU \quad (\text{S13})$$

At pH = 0,  $\Delta G$  for all species as a function of U were initially adopted to determine the phase boundaries. Subsequently, the effect of pH is applied to finally construct the Pourbaix diagrams for 2D PcTM-O<sub>8</sub>-Mn.

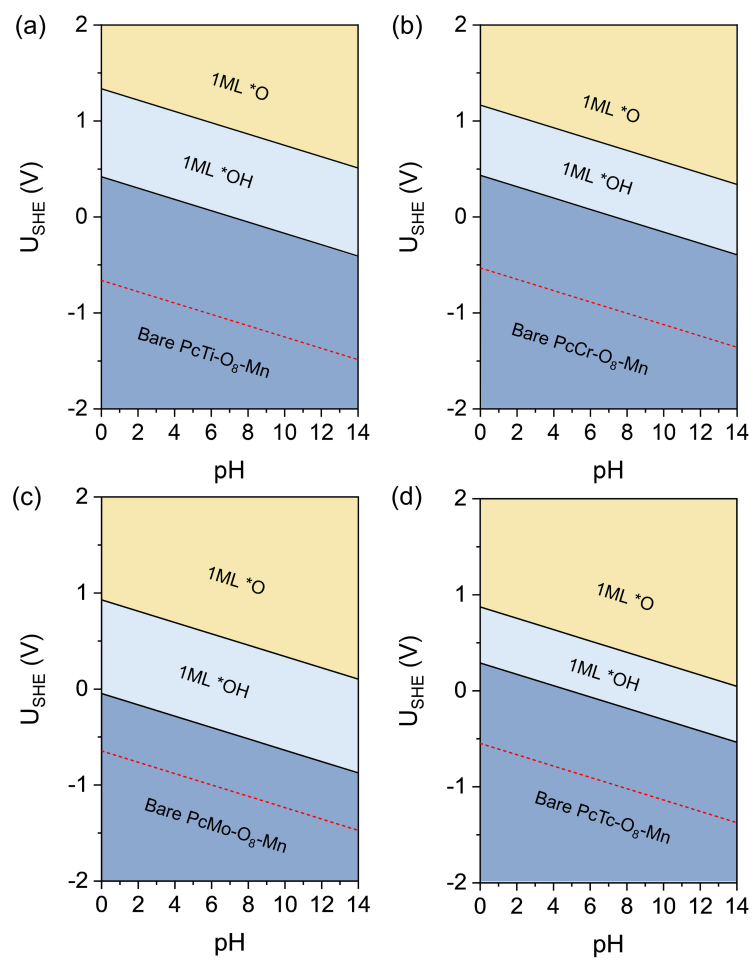

**Figure S13.** Surface Pourbaix diagram of (a) PcTi-O<sub>8</sub>-Mn, (b) PcCr-O<sub>8</sub>-Mn, (c) PcMo-O<sub>8</sub>-Mn, and (d) PcTc-O<sub>8</sub>-Mn.



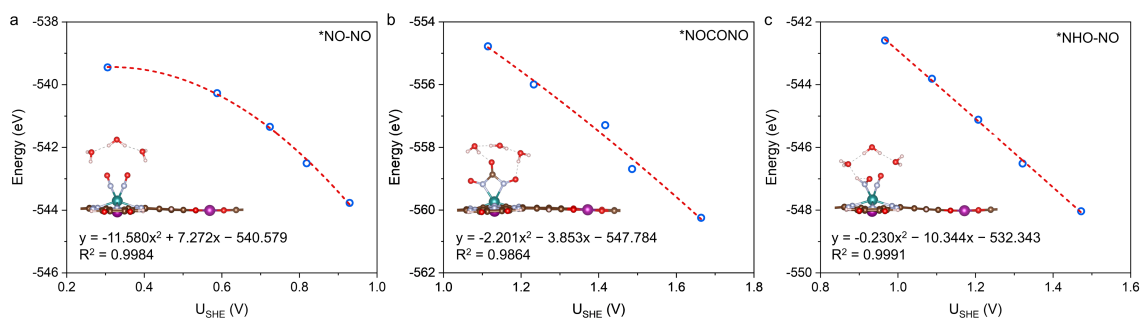

Figure S14. The potential versus free energy of (a) \*NO-NO, (b) \*NOCONO, and (c) \*NHO-NO intermediates on PcV-O<sub>8</sub>-Mn with a H<sub>6</sub>O<sub>3</sub> cluster.

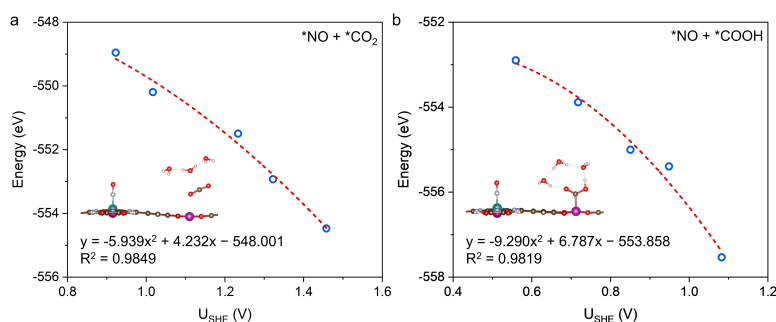

Figure S15. The potential versus free energy of (a) \*NO + \*CO<sub>2</sub> and (b) \*NO + \*COOH intermediates on PcV-O<sub>8</sub>-Mn with a H<sub>6</sub>O<sub>3</sub> cluster.

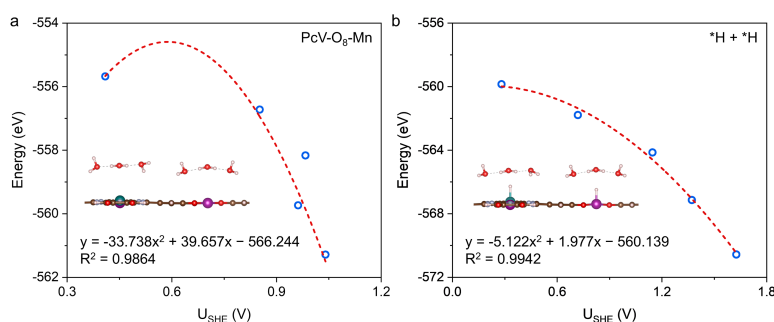

Figure S16. The potential versus free energy of (a) the pure surface and (b) \*H + \*H intermediate on PcV-O<sub>8</sub>-Mn with two H<sub>6</sub>O<sub>3</sub> clusters.

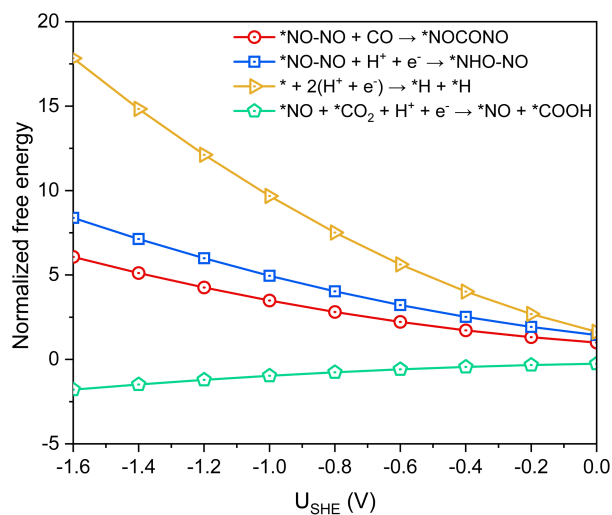

Figure S17. Normalized free energies of the \*NO + \*COOH formation, N–C–N coupling, \*NO-NO hydrogenation, and HER steps on PcV-O<sub>8</sub>-Mn surface as a function of the applied electrode potential vs standard hydrogen electrode. All reaction free energies are referenced to the N–C–N coupling step at 0 V.

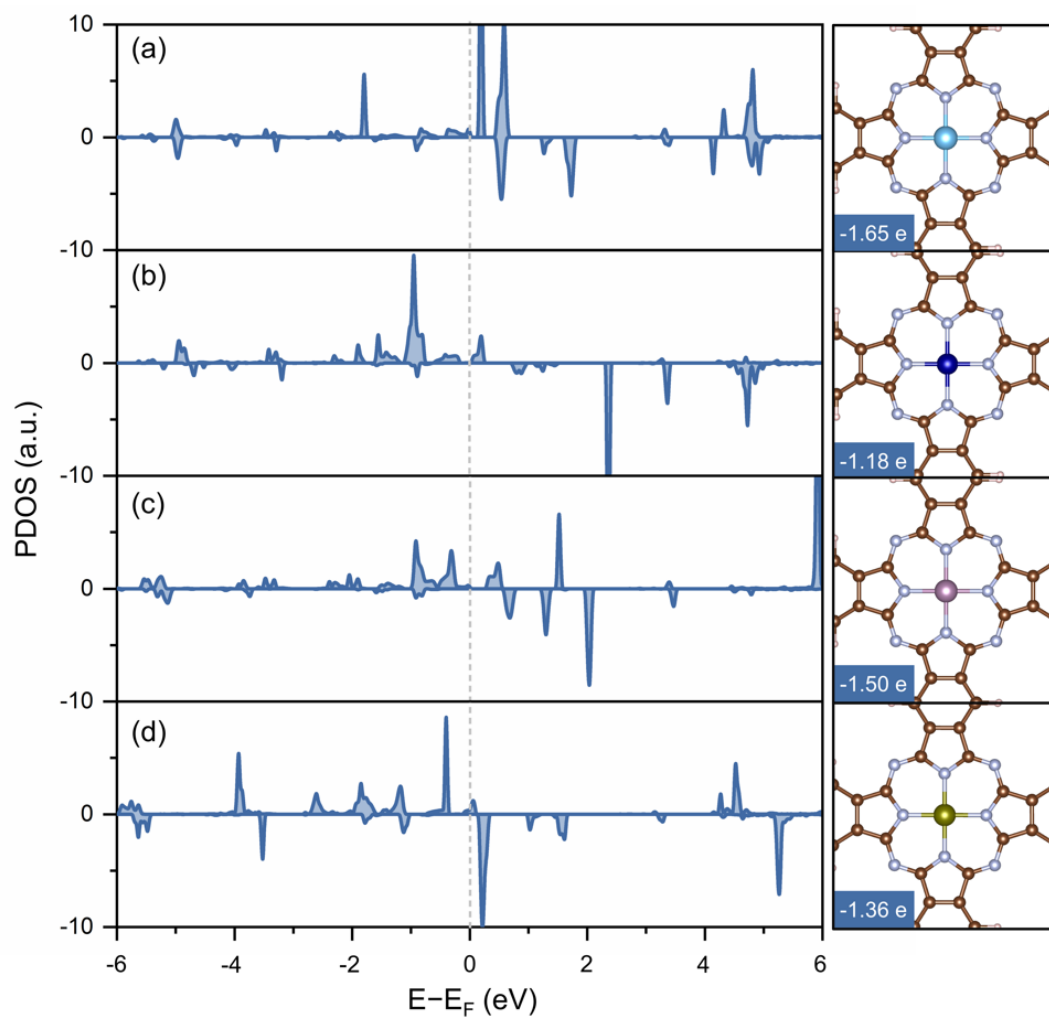

**Figure S18.** Partial density of states (PDOS) for (a) Ti d orbitals of PcTi-O<sub>8</sub>-Mn, (b) Cr d orbitals of PcCr-O<sub>8</sub>-Mn, (c) Mo d orbitals of PcMo-O<sub>8</sub>-Mn, and (d) Tc d orbitals of PcTc-O<sub>8</sub>-Mn.

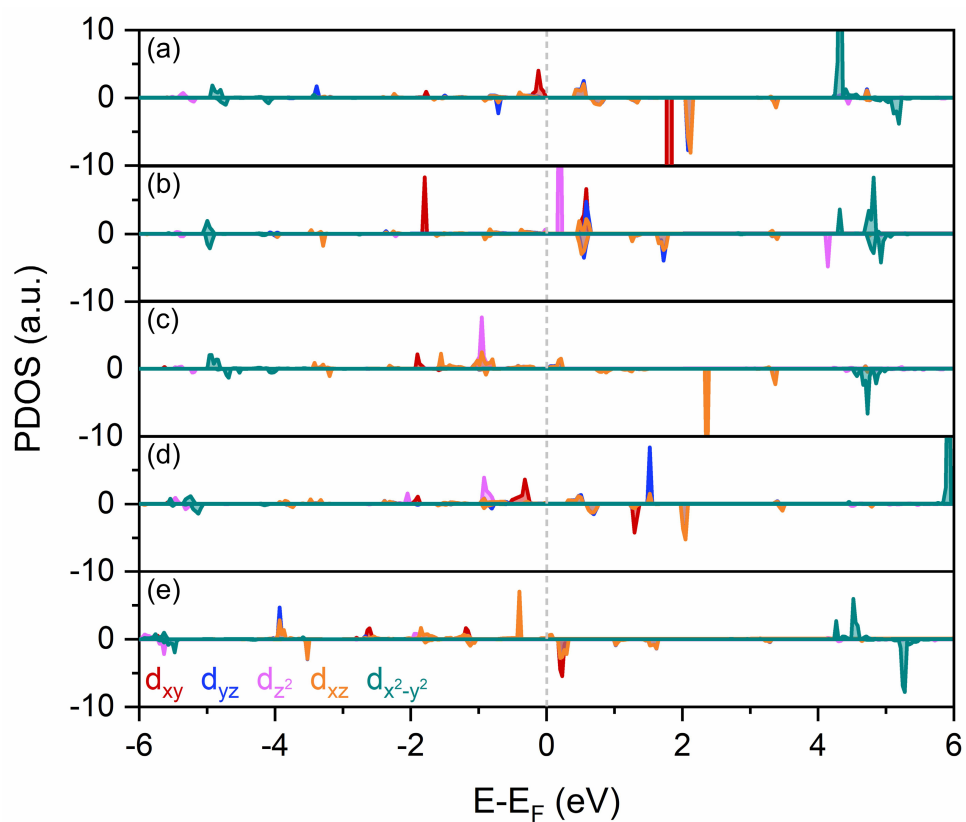

**Figure S19.** Partial density of states (PDOS) for each d orbital of (a) V in PcV-O<sub>8</sub>-Mn, (b) Ti in PcTi-O<sub>8</sub>-Mn, (c) Cr in PcCr-O<sub>8</sub>-Mn, (d) Mo in PcMo-O<sub>8</sub>-Mn, and (e) Tc in PcTc-O<sub>8</sub>-Mn.

**Table S1.** The reaction free energies ( $\Delta G$ ) of possible competing reactions during the urea formation process on PcTM-O<sub>8</sub>-Mn (TM = Ti, V, Cr, Mo, and Tc). Bold fonts represent thermodynamically feasible reactions.

| Competing reactions |                                                | Ti           | V            | Cr           | Mo           | Tc           |
|---------------------|------------------------------------------------|--------------|--------------|--------------|--------------|--------------|
| 1                   | $*NO + *CO \rightarrow *NO + CO$               | <b>-0.26</b> | <b>-0.25</b> | <b>-0.36</b> | <b>-0.24</b> | <b>-0.22</b> |
|                     | $*NO + *CO + H^+ + e^- \rightarrow *NO + *CHO$ | -0.01        | 0.02         | -0.06        | 0.03         | 0.01         |
| 2                   | $*NO + NO \rightarrow *NO-NO$                  | <b>-0.59</b> | <b>-0.12</b> | <b>0.16</b>  | <b>-0.95</b> | <b>-0.19</b> |
|                     | $*NO + CO \rightarrow *NO-CO$                  | 0.65         | 0.47         | 1.25         | 0.46         | 0.29         |
| 3                   | $*NO-NO + CO \rightarrow *NOCONO$              | <b>-0.46</b> | <b>-0.40</b> | <b>0.26</b>  | <b>0.45</b>  | <b>0.16</b>  |
|                     | $*NO-NO + H^+ + e^- \rightarrow *NHO-NO$       | 0.39         | 0.03         | 0.63         | 0.61         | 0.17         |

**Table S2.** Competitive intermediates during the whole reduction pathway for PcV-O<sub>8</sub>-Mn. (Bold fonts denote the energetically favorable species, and numbers in brackets indicate the reaction free energies.)

| Step            | Configuration                                                                                            | E (eV)                             | Step            | Configuration                                                                                              | E (eV)                             |
|-----------------|----------------------------------------------------------------------------------------------------------|------------------------------------|-----------------|------------------------------------------------------------------------------------------------------------|------------------------------------|
| 1 <sup>st</sup> | 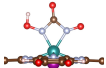                        | <b>-516.125</b>                    | 3 <sup>rd</sup> |                          | -510.274                           |
|                 |                         | -515.975                           |                 |                          | -510.012                           |
|                 |                         | -516.002                           | 4 <sup>th</sup> |                          | -514.655                           |
| 2 <sup>nd</sup> |                         | -519.735                           |                 |                          | -514.726                           |
|                 |                         | -519.674                           |                 |                          | -514.528                           |
|                 |                         | -519.432                           |                 |                          | <b>-515.027</b>                    |
|                 |                         | -520.239<br>(-0.349)               | 5 <sup>th</sup> |                          | -519.221<br>(-0.459)               |
|                 | <br>+ H <sub>2</sub> O | <b>-505.809</b><br><b>(-0.961)</b> |                 |                         | -518.652                           |
| 3 <sup>rd</sup> |                       | <b>-510.740</b>                    |                 |                        | -519.082                           |
|                 |                       | -509.908                           |                 | <br>+ H <sub>2</sub> O | <b>-504.414</b><br><b>(-0.624)</b> |

**Note 2: Thermodynamic Reduction Potentials of PcTM-O<sub>8</sub>-Mn in Aqueous Solution.** With reference to the componential analysis and the modified method mentioned in the previous literature,<sup>28,</sup><sup>29</sup> we assume the PcTM-O<sub>8</sub>-Mn (C<sub>32</sub>H<sub>8</sub>N<sub>8</sub>O<sub>8</sub>TMMn<sub>2</sub>) can be reduced by the electrons through the following reaction:

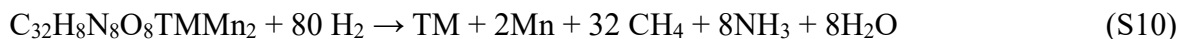

The thermodynamic reduction potential of PcTM-O<sub>8</sub>-Mn ( $\phi$ ) could be calculated as following:

$$\phi = -[\Delta_f G^\circ(\text{TM}) + 2\Delta_f G^\circ(\text{Mn}) + 32\Delta_f G^\circ(\text{CH}_4) + 8\Delta_f G^\circ(\text{NH}_3) + \Delta_f G^\circ(\text{H}_2\text{O}) - \Delta_f G^\circ(\text{C}_{32}\text{H}_8\text{N}_8\text{O}_8\text{TMMn}_2) - 80\Delta_f G^\circ(\text{H}_2)]/160eF + \phi(\text{H}^+/\text{H}_2) \quad (\text{S11})$$

where  $\Delta_f G^\circ(\text{TM})$ ,  $\Delta_f G^\circ(\text{Mn})$ ,  $\Delta_f G^\circ(\text{CH}_4)$ ,  $\Delta_f G^\circ(\text{NH}_3)$ ,  $\Delta_f G^\circ(\text{H}_2\text{O})$ , and  $\Delta_f G^\circ(\text{H}_2)$  are the standard molar Gibbs energies of formation for TM, Mn, CH<sub>4</sub>, NH<sub>3</sub>, H<sub>2</sub>O, and H<sub>2</sub>, respectively, as obtained from the handbook.<sup>30</sup> For the standard molar Gibbs formation energy of PcTM-O<sub>8</sub>-Mn is approximated by its cohesive energy ( $E_{\text{coh}}$ ).  $\phi(\text{H}^+/\text{H}_2)$  is 0 V relative to the normal hydrogen electrode (NHE) potential.  $F$  and  $e$  represent the Faraday constant and the elemental charge, respectively. Based on Equation S11,  $\phi$  values for are PcTM-O<sub>8</sub>-Mn (TM = Ti, V, Cr, Mo, and Tc) obtained as about 0.10 V (relative to NHE), all higher than their  $U_L$  values, promising PcTM-O<sub>8</sub>-Mn systems can be resistant against the electrochemical reduction conditions.

**Table S3.** Standard Molar Gibbs Energy of Formation ( $\Delta_f G^\circ$ , kJ/mol) at 298.15 K and thermodynamic reduction potential ( $\phi$ , V) of the PcTM-O<sub>8</sub>-Mn.

| Molecular formula | $\Delta_f G^\circ$ | Molecular formula | $\Delta_f G^\circ$ | PcTM-O <sub>8</sub> -Mn | $\phi$ |
|-------------------|--------------------|-------------------|--------------------|-------------------------|--------|
| H <sub>2</sub>    | 0                  | V                 | 754.4              | Ti                      | 0.10   |
| H <sub>2</sub> O  | -237.1             | Cr                | 351.8              | V                       | 0.08   |
| CH <sub>4</sub>   | -50.5              | Mn                | 238.5              | Cr                      | 0.11   |
| NH <sub>3</sub>   | -16.4              | Mo                | 612.5              | Mo                      | 0.10   |
| Ti                | 428.4              | Tc                | 678.0              | Tc                      | 0.10   |

**Table S4.** The reaction energies ( $\Delta E$ , eV) of the last two gorgoneion steps for  $^*\text{NH}_2\text{CONH}_2$  on  $\text{VN}_3@\text{G}$ ,  $\text{VN}_4\text{-py}@\text{G}$ , and  $\text{VN}_4\text{-pr}@\text{G}$ .

| Structures                       | $\Delta E (^*\text{NHCONH} \rightarrow ^*\text{NH}_2\text{CONH})$ | $\Delta E (^*\text{NH}_2\text{CONH} \rightarrow ^*\text{NH}_2\text{CONH}_2)$ |
|----------------------------------|-------------------------------------------------------------------|------------------------------------------------------------------------------|
| $\text{VN}_3@\text{G}$           | -0.74                                                             | 0.22                                                                         |
| $\text{VN}_4\text{-py}@\text{G}$ | -0.65                                                             | 0.23                                                                         |
| $\text{VN}_4\text{-pr}@\text{G}$ | -1.22                                                             | -1.10                                                                        |

**Table S5.** The calculated values of ZPE (eV) and TS (eV) for all intermediates on  $\text{PcV-O}_8\text{-Mn}$ .

| Intermediates                 | ZPE  | TS   | Intermediates                | ZPE  | TS   |
|-------------------------------|------|------|------------------------------|------|------|
| $^*\text{NO}$                 | 0.20 | 0.14 | $^*\text{NOHCONO}$           | 0.97 | 0.31 |
| $^*\text{NO} + ^*\text{CO}_2$ | 0.52 | 0.34 | $^*\text{NCONO}$             | 0.53 | 0.30 |
| $^*\text{NO} + ^*\text{COOH}$ | 0.82 | 0.33 | $^*\text{NHCONO}$            | 0.88 | 0.27 |
| $^*\text{NO} + ^*\text{CO}$   | 0.37 | 0.34 | $^*\text{NHCONOH}$           | 1.20 | 0.27 |
| $^*\text{NO} + ^*\text{CHO}$  | 0.67 | 0.30 | $^*\text{NHCON}$             | 0.78 | 0.19 |
| $^*\text{NO-CO}$              | 0.41 | 0.26 | $^*\text{NHCONH}$            | 1.10 | 0.21 |
| $^*\text{NO-NO}$              | 0.39 | 0.21 | $^*\text{NH}_2\text{CONH}$   | 1.46 | 0.23 |
| $^*\text{NHO-NO}$             | 0.69 | 0.30 | $^*\text{NH}_2\text{CONH}_2$ | 1.79 | 0.29 |
| $^*\text{NOCONO}$             | 0.68 | 0.33 |                              |      |      |

**Table S6.** The calculated values of ZPE (eV) and TS (eV) for all intermediates on  $\text{PcTi-O}_8\text{-Mn}$ .

| Intermediates                 | ZPE  | TS   | Intermediates                | ZPE  | TS   |
|-------------------------------|------|------|------------------------------|------|------|
| $^*\text{NO}$                 | 0.17 | 0.17 | $^*\text{NOHCONO}$           | 0.97 | 0.37 |
| $^*\text{NO} + ^*\text{CO}_2$ | 0.50 | 0.35 | $^*\text{NCONO}$             | 0.52 | 0.32 |
| $^*\text{NO} + ^*\text{COOH}$ | 0.80 | 0.36 | $^*\text{NHCONO}$            | 0.86 | 0.30 |
| $^*\text{NO} + ^*\text{CO}$   | 0.35 | 0.35 | $^*\text{NHCONOH}$           | 1.17 | 0.29 |
| $^*\text{NO} + ^*\text{CHO}$  | 0.65 | 0.31 | $^*\text{NHCON}$             | 0.73 | 0.25 |
| $^*\text{NO-CO}$              | 0.37 | 0.33 | $^*\text{NHCONH}$            | 1.09 | 0.22 |
| $^*\text{NO-NO}$              | 0.39 | 0.25 | $^*\text{NH}_2\text{CONH}$   | 1.45 | 0.24 |
| $^*\text{NHO-NO}$             | 0.65 | 0.34 | $^*\text{NH}_2\text{CONH}_2$ | 1.73 | 0.26 |
| $^*\text{NOCONO}$             | 0.67 | 0.34 |                              |      |      |



**Table S7.** The calculated values of ZPE (eV) and TS (eV) for all intermediates on PcCr-O<sub>8</sub>-Mn.

| Intermediates          | ZPE  | TS   | Intermediates                      | ZPE  | TS   |
|------------------------|------|------|------------------------------------|------|------|
| *NO                    | 0.20 | 0.14 | *NOHCONO                           | 0.97 | 0.35 |
| *NO + *CO <sub>2</sub> | 0.53 | 0.33 | *NCONO                             | 0.56 | 0.26 |
| *NO + *COOH            | 0.84 | 0.32 | *NHCONO                            | 0.87 | 0.28 |
| *NO + *CO              | 0.38 | 0.26 | *NHCONOH                           | 1.18 | 0.29 |
| *NO + *CHO             | 0.68 | 0.30 | *NHCON                             | 0.75 | 0.21 |
| *NO-CO                 | 0.41 | 0.29 | *NHCONH                            | 1.04 | 0.22 |
| *NO-NO                 | 0.43 | 0.26 | *NH <sub>2</sub> CONH              | 1.45 | 0.24 |
| *NHO-NO                | 0.71 | 0.28 | *NH <sub>2</sub> CONH <sub>2</sub> | 1.79 | 0.29 |
| *NOCONO                | 0.67 | 0.33 |                                    |      |      |

**Table S8.** The calculated values of ZPE (eV) and TS (eV) for all intermediates on PcMo-O<sub>8</sub>-Mn.

| Intermediates          | ZPE  | TS   | Intermediates                      | ZPE  | TS   |
|------------------------|------|------|------------------------------------|------|------|
| *NO                    | 0.20 | 0.12 | *NOHCONO                           | 0.98 | 0.33 |
| *NO + *CO <sub>2</sub> | 0.53 | 0.38 | *NCONO                             | 0.56 | 0.26 |
| *NO + *COOH            | 0.83 | 0.32 | *NHCONO                            | 0.90 | 0.26 |
| *NO + *CO              | 0.37 | 0.33 | *NHCONOH                           | 1.19 | 0.27 |
| *NO + *CHO             | 0.68 | 0.29 | *NHCON                             | 0.78 | 0.19 |
| *NO-CO                 | 0.41 | 0.25 | *NHCONH                            | 1.09 | 0.22 |
| *NO-NO                 | 0.42 | 0.24 | *NH <sub>2</sub> CONH              | 1.46 | 0.23 |
| *NHO-NO                | 0.71 | 0.29 | *NH <sub>2</sub> CONH <sub>2</sub> | 1.76 | 0.24 |
| *NOCONO                | 0.67 | 0.33 |                                    |      |      |

**Table S9.** The calculated values of ZPE (eV) and TS (eV) for all intermediates on PcTc-O<sub>8</sub>-Mn.

| Intermediates          | ZPE  | TS   | Intermediates                      | ZPE  | TS   |
|------------------------|------|------|------------------------------------|------|------|
| *NO                    | 0.21 | 0.12 | *NOHCONO                           | 0.97 | 0.35 |
| *NO + *CO <sub>2</sub> | 0.54 | 0.33 | *NCONO                             | 0.56 | 0.26 |
| *NO + *COOH            | 0.84 | 0.32 | *NHCONO                            | 0.89 | 0.27 |
| *NO + *CO              | 0.38 | 0.34 | *NHCONOH                           | 1.16 | 0.30 |
| *NO + *CHO             | 0.68 | 0.31 | *NHCON                             | 0.76 | 0.20 |
| *NO-CO                 | 0.43 | 0.20 | *NHCONH                            | 1.07 | 0.23 |
| *NO-NO                 | 0.43 | 0.26 | *NH <sub>2</sub> CONH              | 1.47 | 0.23 |
| *NHO-NO                | 0.73 | 0.27 | *NH <sub>2</sub> CONH <sub>2</sub> | 1.78 | 0.23 |
| *NOCONO                | 0.68 | 0.32 |                                    |      |      |

**Table S10.** The values of ZPE (eV) and TS (eV) for the gas-phase molecules.

| Molecules        | ZPE  | TS   |
|------------------|------|------|
| H <sub>2</sub>   | 0.27 | 0.41 |
| H <sub>2</sub> O | 0.56 | 0.67 |
| NO               | 0.12 | 0.65 |
| CO <sub>2</sub>  | 0.31 | 0.65 |
| CO               | 0.13 | 0.61 |

## References

1. G. Kresse and J. Hafner, *Physical Review B*, 1993, **47**, 558.
2. P. E. Blöchl, *Physical Review B*, 1994, **50**, 17953-17979.
3. G. Kresse and D. Joubert, *Phys. Rev. B*, 1999, **59**, 1758-1775.
4. J. P. Perdew, K. Burke and M. Ernzerhof, *Phys. Rev. Lett.*, 1996, **77**, 3865-3868.
5. S. Grimme, J. Antony, S. Ehrlich and H. Krieg, *J. Chem. Phys.*, 2010, **132**, 154104.
6. J. F. Dobson and T. Gould, *J Phys Condens Matter*, 2012, **24**, 073201.
7. T. Bjorkman, A. Gulans, A. V. Krashennnikov and R. M. Nieminen, *J Phys Condens Matter*, 2012, **24**, 424218.
8. J. F. Dobson, A. White and A. Rubio, *Phys. Rev. Lett.*, 2006, **96**, 073201.
9. T. Sun, Y. Wang, H. Zhang, P. Liu and H. Zhao, *J Colloid Interface Sci*, 2015, **454**, 180-186.
10. V. Wang, N. Xu, J.-C. Liu, G. Tang and W.-T. Geng, *Computer Physics Communications*, 2021, **267**.
11. G. Henkelman and H. Jónsson, *The Journal of Chemical Physics*, 2000, **113**, 9978-9985.
12. G. Henkelman, B. P. Uberuaga and H. Jónsson, *The Journal of Chemical Physics*, 2000, **113**, 9901-9904.
13. R. N. Barnett and U. Landman, *Physical Review B*, 1993, **48**, 2081-2097.
14. K. Mathew, R. Sundararaman, K. Letchworth-Weaver, T. A. Arias and R. G. Hennig, *The Journal of Chemical Physics*, 2014, **140**, 084106.
15. K. Mathew, V. S. C. Kolluru, S. Mula, S. N. Steinmann and R. G. Hennig, *J Chem Phys*, 2019, **151**, 234101.
16. J. K. Nørskov, J. Rossmeisl, A. Logadottir, L. Lindqvist, J. R. Kitchin, T. Bligaard and H. Jónsson, *The Journal of Physical Chemistry B*, 2004, **108**, 17886-17892.
17. Á. Valdés, Z. W. Qu, G. J. Kroes, J. Rossmeisl and J. K. Nørskov, *The Journal of Physical Chemistry C*, 2008, **112**, 9872-9879.
18. Z. Duan and G. Henkelman, *ACS Catalysis*, 2019, **9**, 5567-5573.
19. Q. Wu, C. Dai, F. Meng, Y. Jiao and Z. J. Xu, *Nat Commun*, 2024, **15**, 1095.
20. J. M. P. Martirez and E. A. Carter, *J Am Chem Soc*, 2023, **145**, 12561-12575.
21. Q. Yu and J. M. Bowman, *J Phys Chem A*, 2019, **123**, 1399-1409.
22. H. Bai, D. Liu, P. Zhou, J. Feng, X. Sui, Y. Lu, H. Liu and H. Pan, *Journal of Materials Chemistry A*, 2022, **10**, 25262-25271.
23. M. Pourbaix, *NACE*, 1974, **307**.
24. H. A. Hansen, J. Rossmeisl and J. K. Nørskov, *Phys Chem Chem Phys*, 2008, **10**, 3722-3730.
25. H. A. Hansen, I. C. Man, F. Studt, F. Abild-Pedersen, T. Bligaard and J. Rossmeisl, *Phys Chem Chem Phys*, 2010, **12**, 283-290.
26. K. S. Exner, J. Anton, T. Jacob and H. Over, *Electrochimica Acta*, 2014, **120**, 460-466.
27. T. Lim, G. Y. Jung, J. H. Kim, S. O. Park, J. Park, Y. T. Kim, S. J. Kang, H. Y. Jeong, S. K. Kwak and S. H. Joo, *Nat Commun*, 2020, **11**, 412.
28. L. Ju, M. Bie, X. Tang, J. Shang and L. Kou, *ACS Appl Mater Interfaces*, 2020, **12**, 29335-29343.

29. L. Ju, J. Shang, X. Tang and L. Kou, *J Am Chem Soc*, 2020, **142**, 1492-1500.
30. Lide, D. R. CRC Handbook of Chemistry and Physics, 84th Ed.; CRC Press: Boca Raton, FL., **2003-2004**.
